# Supplementary material for: Using X-ray tomoscopy to explore the dynamics of foaming metal
Source: PubMed Central journal article supplement (PMC6704127; doi:10.1038/s41467-019-11521-1), 2019-08-21
Supplement: 41467_2019_11521_MOESM1_ESM.pdf [file 41467_2019_11521_MOESM1_ESM.pdf]

# Using X-ray tomography to explore the dynamics of foaming metal

García-Moreno et al.

## Supplementary Figures

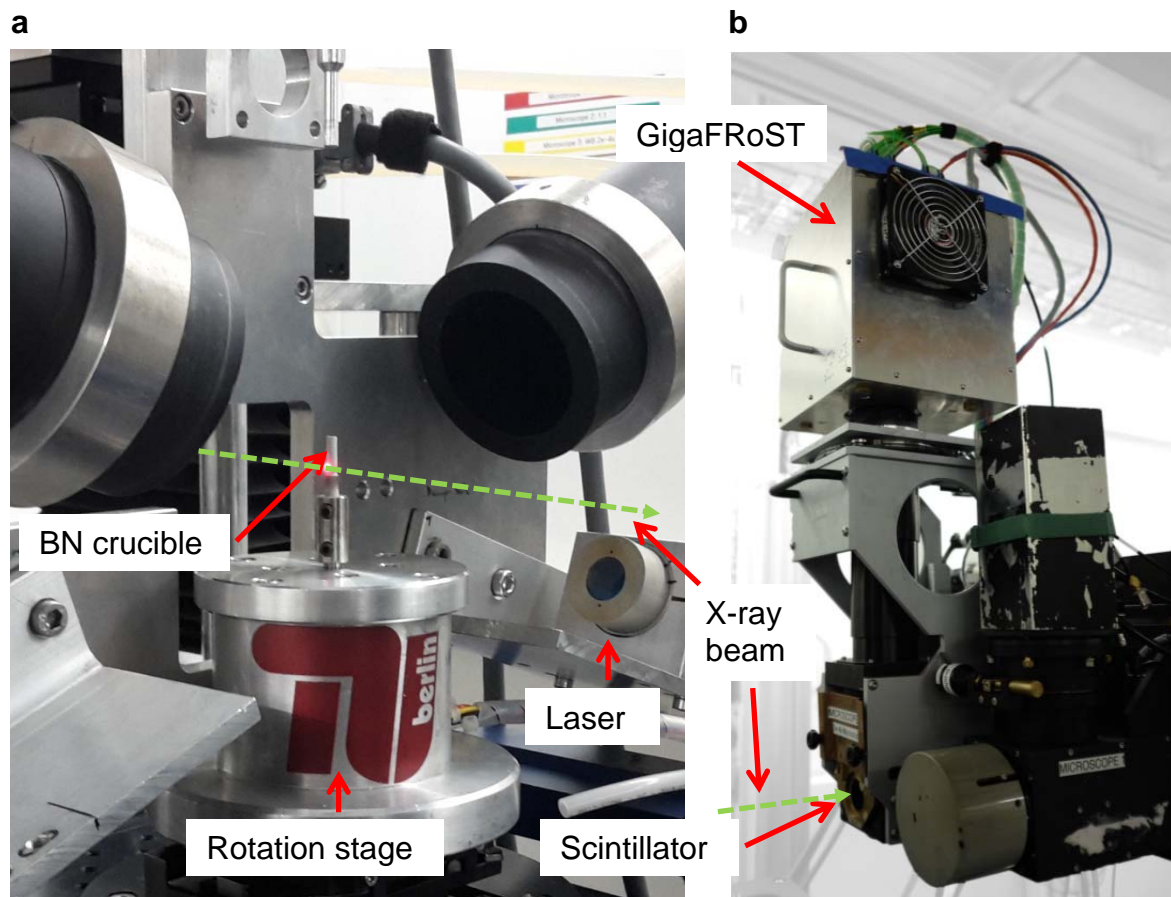

**Supplementary Figure 1. Image of the tomography setup** used for investigating foaming aluminium alloys. **a**, Fast rotation stage ( $>100 \text{ s}^{-1}$  (revolutions per second), allowing for acquisition rates  $>200 \text{ tps}$ ) and a cylindrical crucible made from boron nitride with a foamable sample inside. The foaming temperature was provided by two 150 W near-infrared lasers and the temperature reading by a calibrated pyrometer. **b**, Optical microscope with the scintillator screen on the bottom part and the GigaFRoST CMOS camera on top

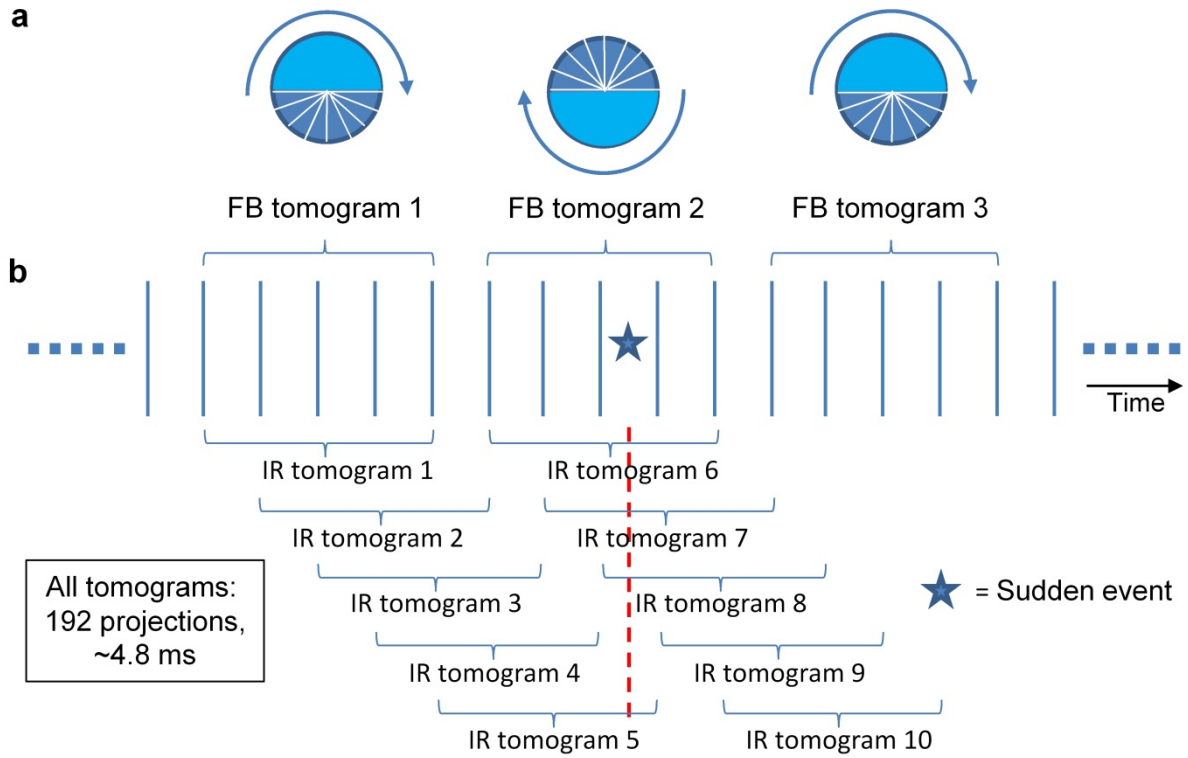

**Supplementary Figure 2. Principle of incremental reconstruction.** **a**, Fixed-block (FB) tomograms. **b**, Incrementally reconstructed (IR) tomograms with a floating start time. Each vertical dash denotes one radiographic projection. The star and the red broken line mark a sudden change of the sample

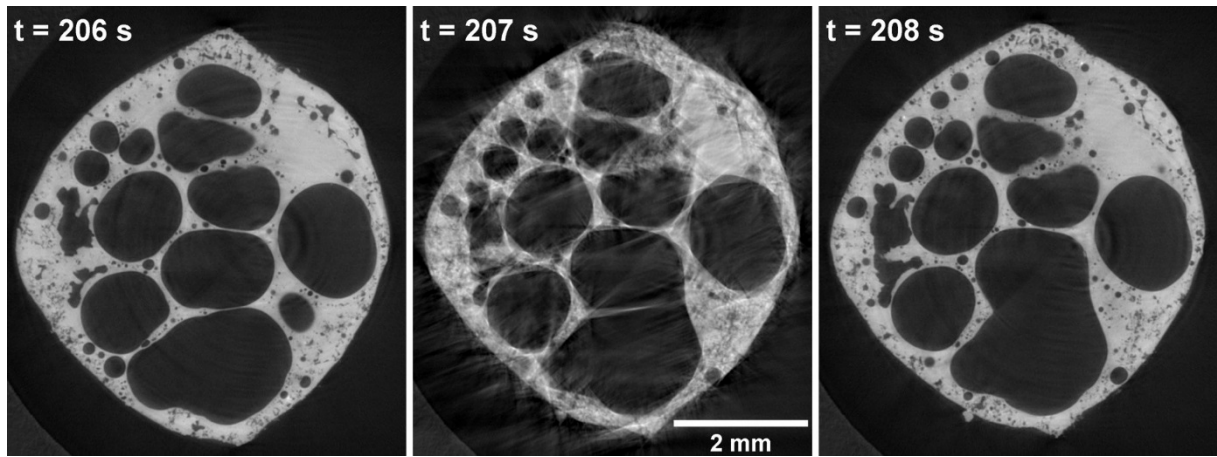

**Supplementary Figure 3. Motion artefacts** occurring in the image sequence acquired at 1 tps as reconstructed with fixed blocks (see Supplementary Figure 2) and shown in Figure 2

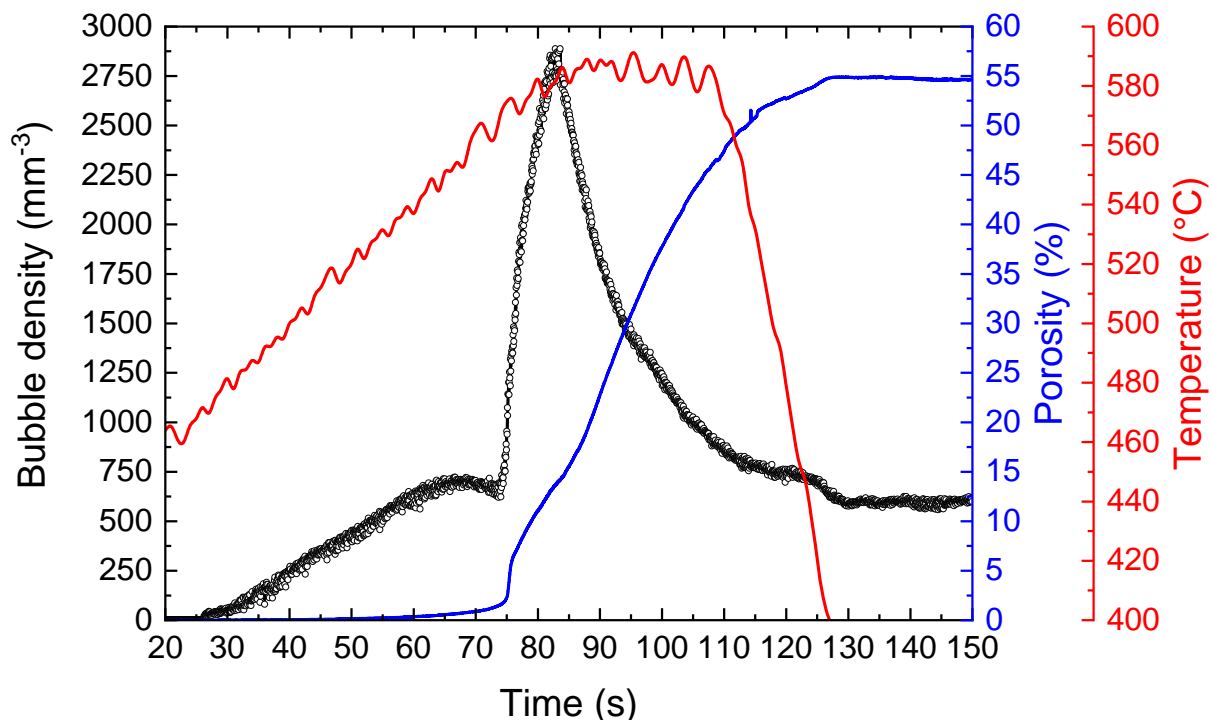

**Supplementary Figure 4. Foam evolution characterised by tomography** similar to experiment in Figure 2 but carried out at an acquisition rate of 20 tps, thus avoiding motion artefacts. Note that the bubble number systematically decreases for longer foaming times due to expansion of the foam to beyond the field of view

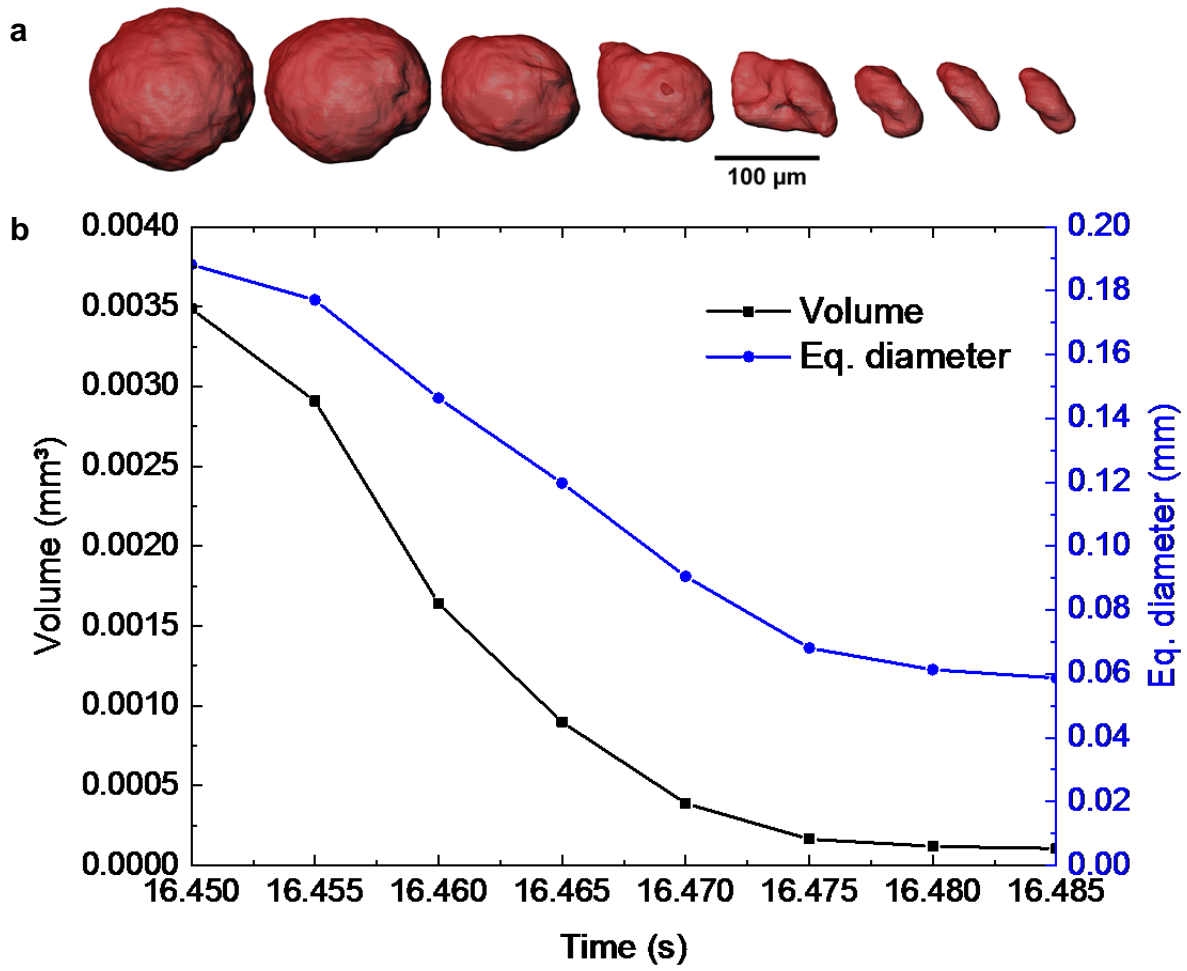

**Supplementary Figure 5. Collapse of the bubble** shown in red in Figure 4. **a**, Visualisation of bubble evolution. **b**, Quantification of bubble volume

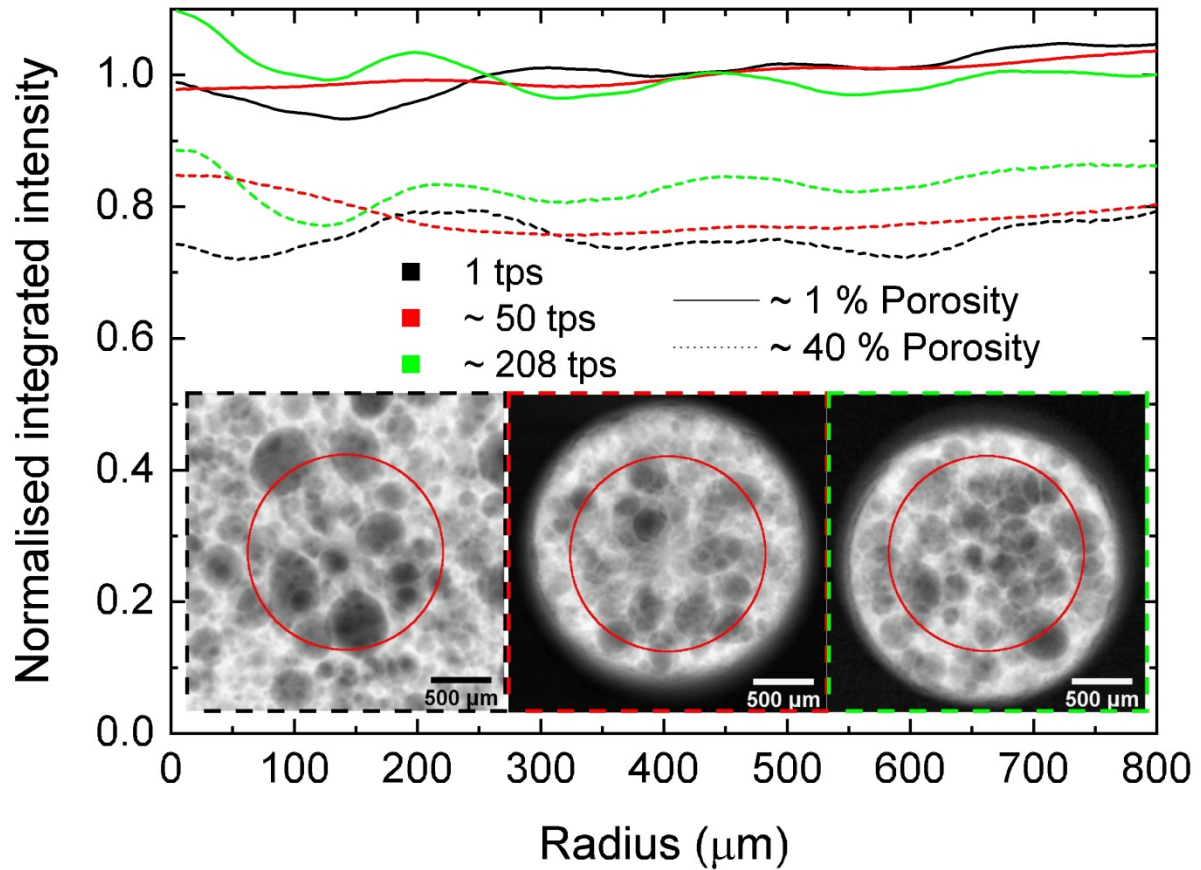

**Supplementary Figure 6. Radial density profiles** shown as normalised integrated intensities over the radial coordinate of different cylindrical liquid foams investigated by tomography at 1 tps (max. 0.001 g radial acceleration), 50 tps (max. 2.5 g) and 208 tps (max. 43 g). Solid and dashed curves denote the results for early (1% porosity) and later foaming stages (40% porosity), respectively. Insets show reconstructed slices superimposed over the z axis of the foams at ~40 % porosity. Regions of interest are located inside the red circles for the three acquisition rates applied (as colour coded)

## Supplementary Tables

| Quantity                                       | Value                            |
|------------------------------------------------|----------------------------------|
| Tomoscopy rate                                 | 208 tps                          |
| Time per tomogram                              | 4.8 ms                           |
| Exposure time                                  | 0.02 ms                          |
| Exposure period                                | 0.025 ms                         |
| Frame rate of radiograms                       | 40 kHz                           |
| Frames per tomography                          | 192                              |
| Number of frames<br>in 1 min of acquisition    | $2.4 \times 10^6$                |
| Number of tomograms<br>in 1 min of acquisition | 12,500                           |
| Effective pixel size                           | 4.9 $\mu\text{m}$                |
| Spatial resolution                             | $\leq 15 \mu\text{m}$            |
| Image size (h $\times$ v)                      | 528 $\times$ 128 pixels          |
| Field of view (h $\times$ v)                   | 2.61 $\times$ 0.63 $\text{mm}^2$ |

**Supplementary Table 1. Important parameters** characterising tomoscopy experiment carried out at the highest acquisition rate
